# Supplementary material
Source: publisher figshare collection journal article supplement (https://sage.figshare.com/ndownloader/files/17985734)
Supplement: Supplementary file 1 [file 17985734]

**Supplemental table 2 Relationship between CDA gene polymorphisms and effectiveness of gemcitabine/cisplatin chemotherapy in Han patients and Uyghur patients with advanced NSCLC.**

| Genotype | Xinjiang Uyghur (n = 54) |             | P1    | Chinese Han (n = 67) |             | P1    | P2    |
|----------|--------------------------|-------------|-------|----------------------|-------------|-------|-------|
|          | Effective                | Ineffective |       | Effective            | Ineffective |       |       |
| A79C     |                          |             |       |                      |             |       |       |
| AA       | 25 (62.5%)               | 15 (37.5%)  | 0.031 | 23 (65.7%)           | 12 (34.3%)  | 0.016 | 0.772 |
| AC       | 3 (30.0%)                | 7 (70.0%)   |       | 7 (35.0%)            | 13 (65.0%)  |       | 0.028 |
| CC       | 0 (0%)                   | 3 (100%)    |       | 3 (25.0%)            | 9 (75.0%)   |       | 0.565 |
| G208A    |                          |             |       |                      |             |       |       |
| GG       | 16 (32.0%)               | 34 (68.0%)  | 1     | 29 (55.8%)           | 23 (44.2%)  | 0.281 | 0.016 |
| GA       | 1 (33.3%)                | 2 (66.7%)   |       | 6 (40.0%)            | 9 (60.0%)   |       | 1     |

P1: Comparisons between genotypes within the same ethnic group; P2: comparison between Xinjiang Uyghur patients and Chinese Han patients with the same genotype.
